# Supplementary material for: Dynamic Integration of Value Information into a Common Probability Currency as a Theory for Flexible Decision Making
Source: PubMed Central journal article supplement (PMC4578920; doi:10.1371/journal.pcbi.1004402), 2015-09-22
Supplement: pcbi.1004402.s002.pdf [file pcbi.1004402.s002.pdf]

# 1 S1 text

2 In S1 text, we provide details for the stochastic optimal control framework used to model  
3 reaching movements to single targets.

## 4 1 Hand modeling.

5 We modeled the dynamics of the hand as a “point of mass” ( $m = 1 \text{ Kg}$ ), in Cartesian coordinates,  
6 with 2-dimensional position  $\mathbf{p}_t^h = [x_h(t), y_h(t)]^T$  and velocity  $\dot{\mathbf{p}}_t^h = [\dot{x}_h(t), \dot{y}_h(t)]^T$  [1]. The com-  
7 bined actions of all muscles is represented by the force vector  $\mathbf{f}_t = [f_x(t), f_y(t)]^T$ . Neural control  
8  $\mathbf{u}_t$  is transformed into these forces  $\mathbf{f}_t$  through second-order muscle-like low-pass filters with con-  
9 stants  $\tau_1$  and  $\tau_2$ , and by adding control-dependent multiplicative noise [1].

$$\tau_1\tau_2\ddot{\mathbf{f}}_t + (\tau_1 + \tau_2)\dot{\mathbf{f}}_t + \mathbf{f}_t = \mathbf{u}_t \quad (1)$$

10 The second-order low pass filters can be written as a pair of coupled first-order filters with  
11 outputs  $\mathbf{g}$  and  $\mathbf{f}$ , as:

$$\tau_1\dot{\mathbf{g}}_t + \mathbf{g}_t = \mathbf{u}_t, \quad \tau_2\dot{\mathbf{f}}_t + \mathbf{f}_t = \mathbf{g}_t \quad (2)$$

12 Assuming that the target position is on  $\mathbf{p}^G = [x_G, y_G]^T$ , the discrete-time state is described

13 through a  $10^{th}$ -dimensional vector  $\mathbf{x}_t$ , Eq. (3).

$$\mathbf{x}_t = [x_h(t), y_h(t), \dot{x}_h(t), \dot{y}_h(t), f_x(t), f_y(t), g_x(t), g_y(t), x_G, y_G]^T \quad (3)$$

14 The discrete-time dynamics of the hand are given by Eq. (4):

$$\begin{aligned} \mathbf{p}_{t+\delta t}^h &= \mathbf{p}_t^h + \dot{\mathbf{p}}_t^h \delta t \\ \dot{\mathbf{p}}_{t+\delta t}^h &= \dot{\mathbf{p}}_t^h + \mathbf{f}_t \frac{\delta t}{m} \\ \mathbf{f}_{t+\delta t} &= \mathbf{f}_t \left(1 - \frac{\delta t}{\tau_2}\right) + \mathbf{g}_t \frac{\delta t}{\tau_2} \\ \mathbf{g}_{t+\delta t} &= \mathbf{g}_t \left(1 - \frac{\delta t}{\tau_1}\right) + \mathbf{u}_t (1 + \sigma_c \epsilon_t) \frac{\delta t}{\tau_1} \end{aligned} \quad (4)$$

15 where  $\delta t = 0.01s$  is the sampling period of discretization. The product term  $\sigma_c \epsilon_t \mathbf{u}_t$  describes  
 16 the multiplicative noise added to the control signal  $\mathbf{u}_t$ , with  $\sigma_c = 1$ , which is a unitless variable  
 17 defined as the noise magnitude related to the control signal magnitude [1].

## 18 **2 Reaching to a single target.**

19 Within the stochastic optimal control framework, control policies originate as the solution to an  
 20 optimization problem. The basic idea is to find a sequence of motor commands that acquire as

21 much reward as possible, while spending as little effort as possible. For reaching, given the arm's  
 22 kinematics and the sensory and motor noise in estimating and controlling state of the hand, the  
 23 stochastic optimal control finds a policy  $\mathbf{u}_t^* = \pi^*(\mathbf{x}_t)$ , for time instances  $t = [t_1, \dots, t_{end}]$  that  
 24 optimizes the cost function  $J$  described in Eq. (5), for each state of the hand and the environment  
 25  $\mathbf{x}_t$ .

$$J(\mathbf{x}_t, \pi(\mathbf{x}_t)) = \|\mathbf{p}_{t_{end}}^h - \mathbf{p}^G\|^2 + \|\dot{\mathbf{p}}_{t_{end}}^h\|^2 + \|\mathbf{f}_{t_{end}}\|^2 + \sum_{t=1}^{t_{end}-1} \pi(\mathbf{x}_t)^T R \pi(\mathbf{x}_t) \quad (5)$$

26 The first term is the accuracy cost and penalizes policies that drive the end-point of the  
 27 reaching trajectory away from the target position  $\mathbf{p}^G$ . The second and the third terms specify that  
 28 the reaching movement should stop at time  $t_{end}$  and the last term is the motor command cost that  
 29 penalizes the effort required to reach the target. The matrix  $R = \frac{1}{t_{end}} \begin{bmatrix} r_x & 0 \\ 0 & r_y \end{bmatrix}$  is the control-  
 30 dependent cost of the hand motion in the x and y dimension ( $r_x = r_y = 0.001$ ).

31 We can write Eq. (5) in the general form of optimal control cost function as follows:

$$J = (\mathbf{x}_{t_{end}} - S\mathbf{p}^G)^T Q_{t_{end}} (\mathbf{x}_{t_{end}} - S\mathbf{p}^G) + \sum_{t=1}^{t_{end}-1} \pi(\mathbf{x}_t)^T R \pi(\mathbf{x}_t) \quad (6)$$

32 where  $S$  is a matrix that picks out the hand and target positions from the state vector. The  
 33 time-varying matrix  $Q_t$  describes the state-dependent cost and is the zero matrix for any time

34  $t < t_{end}$  and is equal to the Hessian matrix of the cost function evaluated at the end of the movement  
35  $t_{end}$ .

36 To minimize the cost function in Eq. (6), a model of the system dynamics and sensory feed-  
37 back must be incorporated. Abundant evidence suggests the sensory system uses internal forward  
38 models that predict the next state at time  $t + 1$ ,  $\hat{\mathbf{x}}_{t+1|t}$ , based on the sensory feedback  $\mathbf{y}_t$ , the current  
39 state estimate  $\hat{\mathbf{x}}_t$  and the control commands  $\mathbf{u}_t$  [2], which helps overcome control instabilities due  
40 to noisy sensors and temporal delays. Following, we modeled the hand and the state space using  
41 linear dynamics and measurement as a discrete linear system, Eq. (7), considering the motor com-  
42 mands are corrupted by multiplicative noise, normally distributed with zero mean and standard  
43 deviation proportional to the magnitude of the control commands and the state variables [1].

$$\begin{aligned}\mathbf{x}_{t+1} &= A\mathbf{x}_t + B\mathbf{u}_t + \xi_t + C(\mathbf{u}_t)\epsilon_t \\ \mathbf{y}_t &= H\mathbf{x}_t + \omega_t\end{aligned}\tag{7}$$

44 where  $A$ ,  $B$  and  $H$  are the actual system dynamics and observation matrices, respectively.

$$A = \begin{bmatrix} 1 & 0 & \delta t & 0 & 0 & 0 & 0 & 0 & 0 & 0 & 0 \\ 0 & 1 & 0 & \delta t & 0 & 0 & 0 & 0 & 0 & 0 & 0 \\ 0 & 0 & 1 & 0 & \frac{\delta t}{m} & 0 & 0 & 0 & 0 & 0 & 0 \\ 0 & 0 & 0 & 1 & 0 & \frac{\delta t}{m} & 0 & 0 & 0 & 0 & 0 \\ 0 & 0 & 0 & 0 & 1 - \frac{\delta t}{\tau_2} & 0 & \frac{\delta t}{\tau_2} & 0 & 0 & 0 & 0 \\ 0 & 0 & 0 & 0 & 0 & 1 - \frac{\delta t}{\tau_2} & 0 & \frac{\delta t}{\tau_2} & 0 & 0 & 0 \\ 0 & 0 & 0 & 0 & 0 & 0 & 1 - \frac{\delta t}{\tau_1} & 0 & 0 & 0 & 0 \\ 0 & 0 & 0 & 0 & 0 & 0 & 0 & 1 - \frac{\delta t}{\tau_1} & 0 & 0 & 0 \\ 0 & 0 & 0 & 0 & 0 & 0 & 0 & 0 & 1 & 0 & 0 \\ 0 & 0 & 0 & 0 & 0 & 0 & 0 & 0 & 0 & 0 & 1 \end{bmatrix}$$

45

$$B = \begin{bmatrix} \mathbf{0}_{6 \times 2} \\ \frac{\delta t}{\tau_1} & 0 \\ 0 & \frac{\delta t}{\tau_1} \\ \mathbf{0}_{2 \times 2} \end{bmatrix}, H = \begin{bmatrix} \mathbf{I}_{6 \times 6} & | & \mathbf{0}_{6 \times 4} \end{bmatrix} \quad (8)$$

46

47 The noise variables  $\xi_t$ ,  $\omega_t$  and  $\epsilon_t$  are normally distributed variables with zero mean and co-  
48 variance  $\Omega^\xi \geq 0$ ,  $\Omega^\omega \geq 0$  and  $\Omega^\epsilon = I$ , respectively.  $C(\mathbf{u}_t)$  is a scaling matrix for control-dependent

49 system noise, such as  $C(\mathbf{u})\epsilon = \sum_i C_i \mathbf{u} \epsilon^i$ , where  $\epsilon^i$  is the  $i^{th}$  component of the random variable  $\epsilon$ .

50         Given the belief about the state at time  $t$  and the goal of the task, the stochastic optimal  
51 controller generates the optimal policy - the best sequence of actions that we can perform to reach  
52 the goal -  $\pi^*(\mathbf{x}_t) = \mathbf{u}_t^*$  that minimizes the expected cost function in Eq. (5). This form of optimal  
53 control is a modified Linear Quadratic Gaussian (LQG) regulator, since the dynamics of the system  
54 are linear, the expected cost function is Quadratic and the noise is Gaussian, but with signal-  
55 dependent noise [1].

56         Incorporating the optimal policy into the system model generates a feedback controller that  
57 uses its forward model to generate predictions  $\hat{\mathbf{y}}_t$  from knowledge of controls, dynamics and sen-  
58 sory measurements, and it combines predictions with sensory feedback  $\mathbf{y}_t$  via Eq. (9) to update the  
59 belief about the state in time  $t + 1$ .

$$\hat{\mathbf{x}}_{t+1|t+1} = (A - BL_t)\hat{\mathbf{x}}_{t+1|t} + K_t(\mathbf{y}_t - H\hat{\mathbf{x}}_{t+1|t}) \quad (9)$$

60 where  $K_t$  describes the Kalman gain at the given time  $t$ .

62  
61

## References

- 63 1. Todorov E (2005) Stochastic optimal control and estimation methods adapted to the noise  
64 characteristics of the sensorimotor system. *Neural Comput.* 17: 1084-1108.
  
- 65 2. Diedrichsen J, Shadmehr R, Ivry R (2010) The coordination of movement. Optimal feedback  
66 control and beyond. *Trends Cogn Sci.* 14: 31-39.
