# Supplementary material for: Dynamic Integration of Value Information into a Common Probability Currency as a Theory for Flexible Decision Making
Source: PubMed Central journal article supplement (PMC4578920; doi:10.1371/journal.pcbi.1004402), 2015-09-22
Supplement: pcbi.1004402.s004.pdf [file pcbi.1004402.s004.pdf]

## 1 **S3 text**

2        One of the key computations in the present framework is the transformation of the value  
3 function  $V_{\pi_j}(\mathbf{x}_t)$  to probability value using a soft-max type equation (see Eq. 3 and Eq. 4 in the  
4 main manuscript). It characterizes the probability of spending at least effort  $V_{\pi_j}(\mathbf{x}_t)$  starting from  
5 the current state  $\mathbf{x}_t$  at time  $t$  and adopting the policy  $\pi_j(\mathbf{x}_t)$  to move to the target  $j$ . The free param-  
6 eter in this transformation is the inverse temperature  $\lambda$ . The values of  $\lambda$  were chosen empirically,  
7 but the qualitatively predictions presented in the manuscript are relative robust to the chosen val-  
8 ues of  $\lambda$ . Note that the same value of  $\lambda$  was used in every simulated experiment. Particularly, we  
9 set  $\lambda = 0.1$  for the rapid-reaching experiments,  $\lambda = 0.01$  for the eye-movement experiments and  
10  $\lambda = 0.5$  for the sequential reaching (i.e., copy geometrical shapes) experiment.
