# Supplementary material for: Dynamic Integration of Value Information into a Common Probability Currency as a Theory for Flexible Decision Making
Source: PubMed Central journal article supplement (PMC4578920; doi:10.1371/journal.pcbi.1004402), 2015-09-22
Supplement: pcbi.1004402.s005.pdf [file pcbi.1004402.s005.pdf]

## 1 **S4 text**

2 We incorporate the history of trials in the computational framework by varying the target  
3 probability  $p(\text{target} = j)$  with the frequency that the target  $j$  was cued for action on the past  
4 trials. We update the value of the probability on each trial using a simple reinforcement learning  
5 algorithm. This algorithm estimates the target probability  $p_{k+1}(\text{target} = j)$  at trial  $k + 1$  given the  
6 recent trial history, Eq. (1).

$$p_{k+1}(\text{target} = j) = p_k(\text{target} = j) + \alpha(C - p_k(\text{target} = j)) \quad (1)$$

7 where  $k$  is the current trial. We set  $C = 1$ , if the target  $j$  was cued for action on the current trial,  
8 otherwise  $C = 0$ . Also,  $\alpha$  is the learning rate that was set to 0.4 on the simulations.
